# Supplementary material
Source: Springer Nature journal article supplement (https://www.springermedizin.de/resource/supplementary/12888_2012_1118_MOESM1_ESM.pdf/9479244)
Supplement: MOESM1 [file 9479244]

1151 studies identified  
including abstracts contained  
key words

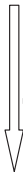

1089 studies excluded because they  
were not validated in LMIC. Some  
were assessing both depression and  
anxiety disorders concurrently

62 articles abstracted and  
read by authors

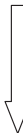

46 studies excluded mainly as a result of  
inappropriate or ambiguous gold standard  
administered to participants

19 articles fulfill the study  
criteria
